# Supplementary material for: Predictive modeling of ICU-AW inflammatory factors based on machine learning
Source: PubMed Central journal article supplement — BMC Neurol. 2024 Dec 19;24:483. doi: 10.1186/s12883-024-03981-w (PMC11658462; doi:10.1186/s12883-024-03981-w), 2024-12-19
Supplement: 12883_2024_3981_MOESM1_ESM.pdf [file 12883_2024_3981_MOESM1_ESM.pdf]

## Supplementary material

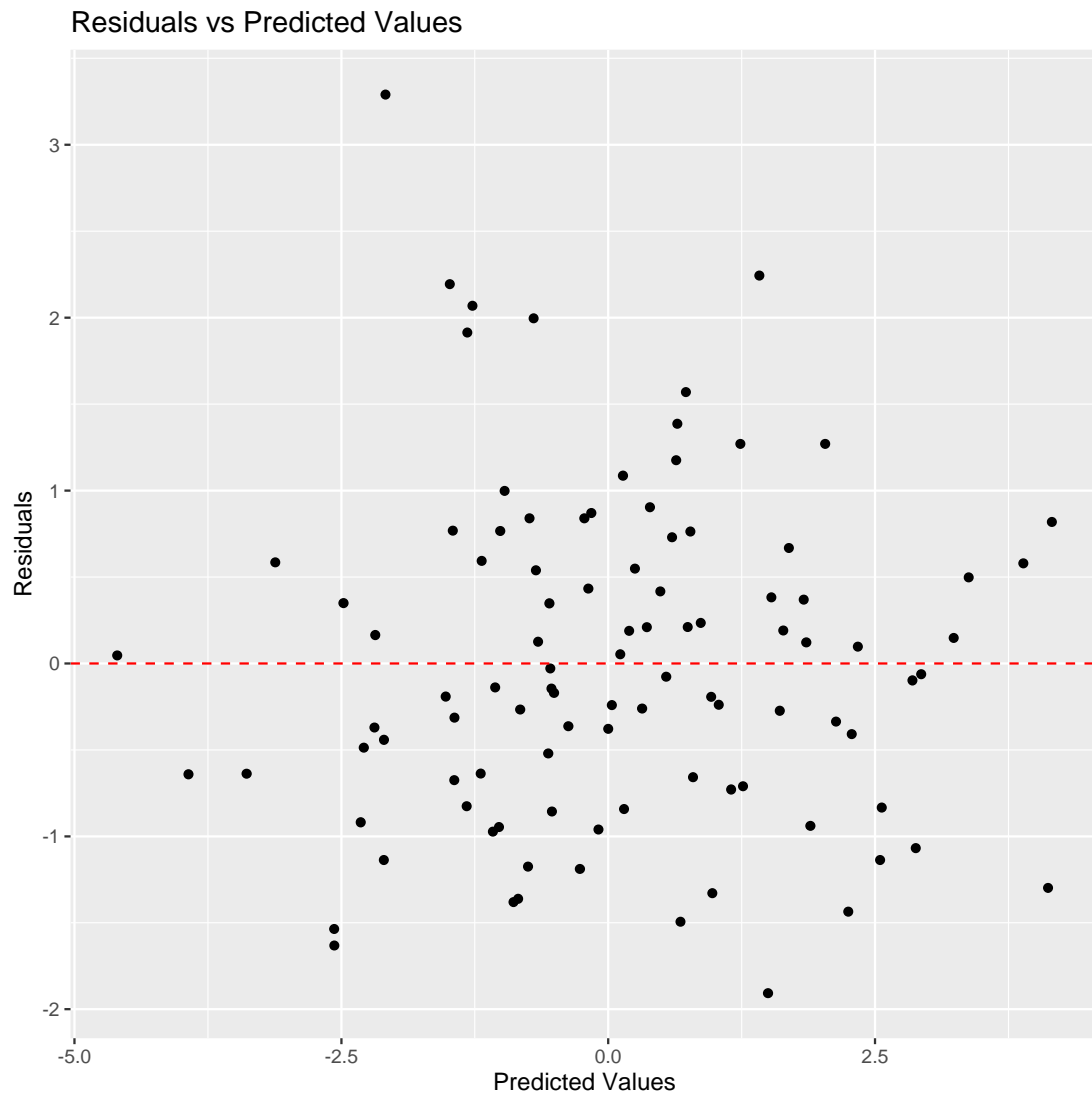

Supplementary Figure 1 Residuals vs Predicted Values Plot

Supplementary Table 1 Comparison of Model Performance between the Current

### Study and Previous Research

| References                             | Country     | Accuracy | Internal validation | External validation | Risk stratification |
|----------------------------------------|-------------|----------|---------------------|---------------------|---------------------|
| Current Study                          | China       | 0.821    | Yes                 | Yes                 | Yes                 |
| study of Wieske et al <sup>(2)</sup> . | Netherlands | 0.72     | Yes                 | Yes                 | No                  |

Supplementary Table 2 Normal values of interleukins

| variables             | normal reference values |
|-----------------------|-------------------------|
| IL-1 $\beta$ (pg/ml)  | $\leq 12.10$            |
| IL-2(pg/ml)           | $\leq 11.40$            |
| IL-4(pg/ml)           | $\leq 12.90$            |
| IL-5(pg/ml)           | $\leq 3.40$             |
| IL-6(pg/ml)           | $\leq 20.00$            |
| IL-8(pg/ml)           | $\leq 21.40$            |
| IL-10(pg/ml)          | $\leq 5.90$             |
| IL-12p70(pg/ml)       | $\leq 3.20$             |
| IL-17(pg/ml)          | $\leq 20.60$            |
| IFN- $\alpha$ (pg/ml) | $\leq 7.90$             |
| IFN- $\gamma$ (pg/ml) | $\leq 17.30$            |
| TNF- $\alpha$ (pg/ml) | $\leq 5.50$             |

Supplementary Table 3 Performance metrics for the three models in the training

dataset including inflammatory factors

| Model | Accuracy  | specificity | Precision | Recall    | F1 score  |
|-------|-----------|-------------|-----------|-----------|-----------|
| LR    | 0.7298578 | 0.7300000   | 0.5235294 | 0.7295082 | 0.6095890 |
| RF    | 0.9201521 | 0.9331210   | 0.9009434 | 0.9009434 | 0.9009434 |
| XGB   | 0.9087452 | 0.9318182   | 0.9009434 | 0.8761468 | 0.8883721 |

Supplementary Table 4 Performance metrics for the three models in the testing dataset

including inflammatory factors

| Model | Accuracy  | specificity | Precision | Recall    | F1 score  |
|-------|-----------|-------------|-----------|-----------|-----------|
| LR    | 0.7692308 | 0.7968750   | 0.6904762 | 0.7250000 | 0.7073171 |
| RF    | 0.6242038 | 0.7340426   | 0.5370370 | 0.4603175 | 0.4957265 |
| XGB   | 0.6942675 | 0.7835052   | 0.6111111 | 0.5500000 | 0.5789474 |

Supplementary Table 5 Performance metrics for the three models in the training dataset excluding inflammatory factors

| Model | Accuracy  | specificity | Precision | Recall    | F1 score  |
|-------|-----------|-------------|-----------|-----------|-----------|
| LR    | 0.7208672 | 0.7224335   | 0.5100671 | 0.7169811 | 0.5960784 |
| RF    | 0.8916350 | 0.8703170   | 0.7877358 | 0.9329609 | 0.8542199 |
| XGB   | 0.8802281 | 0.8934169   | 0.8396226 | 0.8599034 | 0.8496420 |

Supplementary Table 6 Performance metrics for the three models in the testing dataset excluding inflammatory factors

| Model | Accuracy  | specificity | Precision | Recall    | F1 score  |
|-------|-----------|-------------|-----------|-----------|-----------|
| LR    | 0.5668790 | 0.5952381   | 0.2153846 | 0.4516129 | 0.2916667 |
| RF    | 0.5286624 | 0.5762712   | 0.2307692 | 0.3846154 | 0.2884615 |
| XGB   | 0.5987261 | 0.6494845   | 0.4769231 | 0.5166667 | 0.4960000 |
